# Supplementary material for: Window screen inspired fibrous materials with anisotropic thickness gradients for improving light transmittance
Source: Royal Society of Chemistry journal article supplement (doi:10.1039/c9nr02810b), 2019-01-01
Supplement: c9nr02810b1.pdf [file c9nr02810b1.pdf]

## Electronic Supporting Information (ESI)

### Window screen inspired fibrous materials with anisotropic thickness gradients for improving light transmittance

Nan Pan, Juanrong Qin, Pingping Feng, Botao Song\*

Key Laboratory of Synthetic and Natural Functional Molecule Chemistry of Ministry of Education, College of Chemistry and Materials Science, Northwest University, Xi'an 710069, Shaanxi, People's Republic of China.

Corresponding author: Botao Song (E-mail : botaosong@nwu.edu.cn)

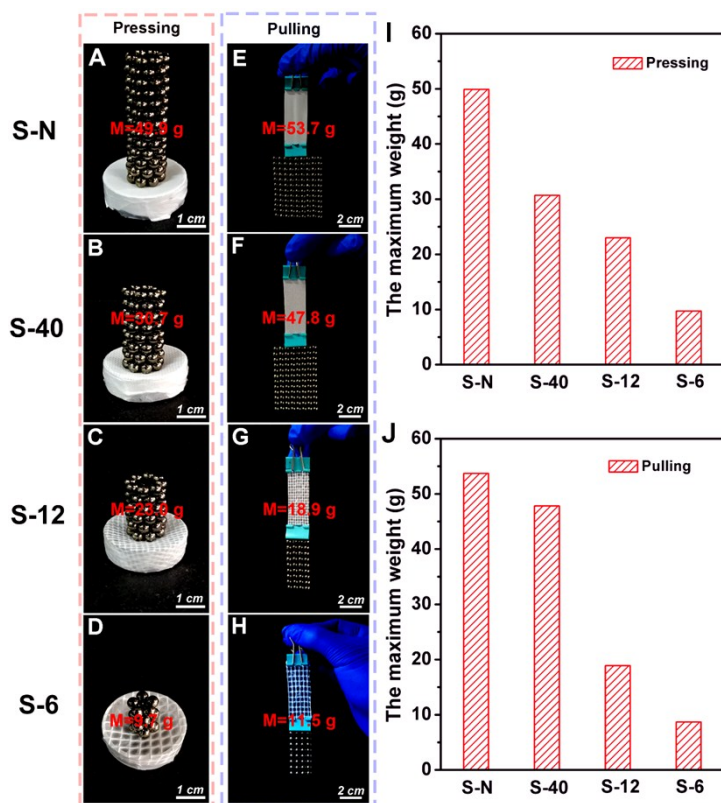

Figure S1. Mechanical property of the four kinds of fibrous mats (S-N, S-40, S-12, S-6).

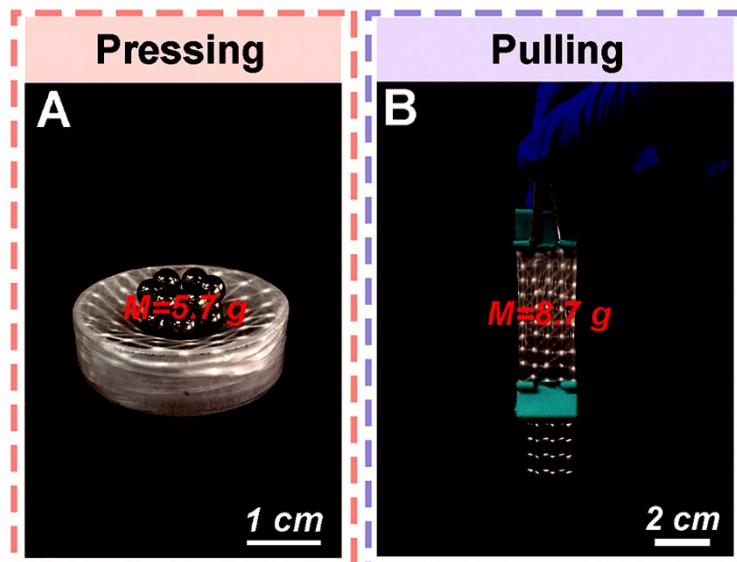

Figure S2. Mechanical property of the fibrous mat N-6.
